# Supplementary material
Source: PubMed Central journal article supplement (PMC6459280)
Supplement: Supp_Fig1.pdf [file Supp_Fig1.pdf]

## Supplementary Data

p66Shc-WB

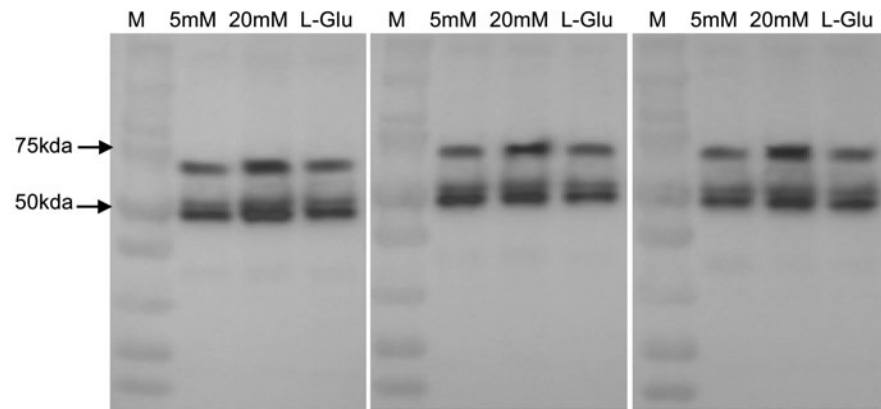

$\beta$ -actin-WB

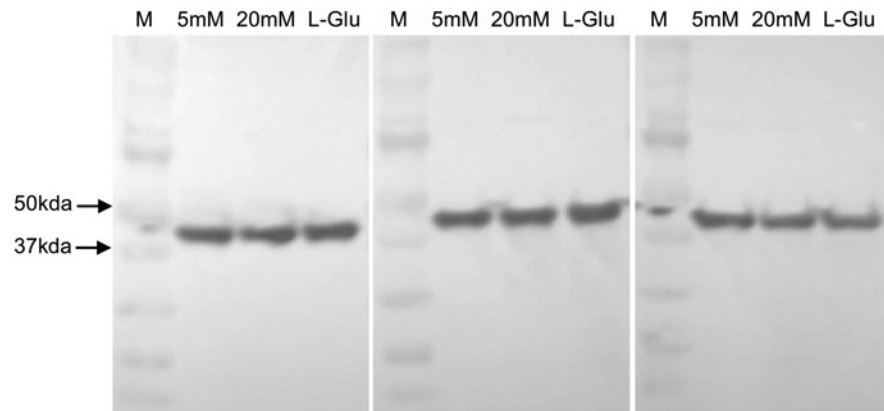

**SUPPLEMENTARY FIG. S1.** p66Shc-WB and  $\beta$ -actin-WB. WB, western blot.
