# Supplementary material
Source: PubMed Central journal article supplement (PMC6459280)
Supplement: Supp_Fig2.pdf [file Supp_Fig2.pdf]

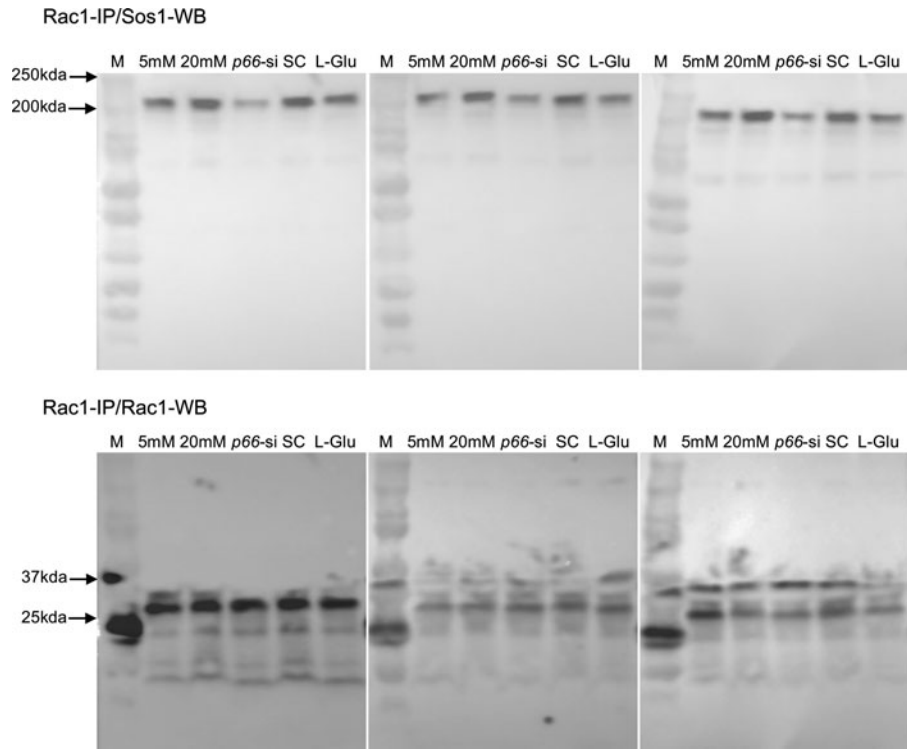

**SUPPLEMENTARY FIG. S2. Rac1-IP/Sos1-WB and Rac1-IP/Rac1-WB.** IP, immunoprecipitate; Rac1, Ras-related C3 botulinum toxin substrate 1; Sos1, Son of Sevenless 1.
