# Supplementary material
Source: PubMed Central journal article supplement (PMC6459280)

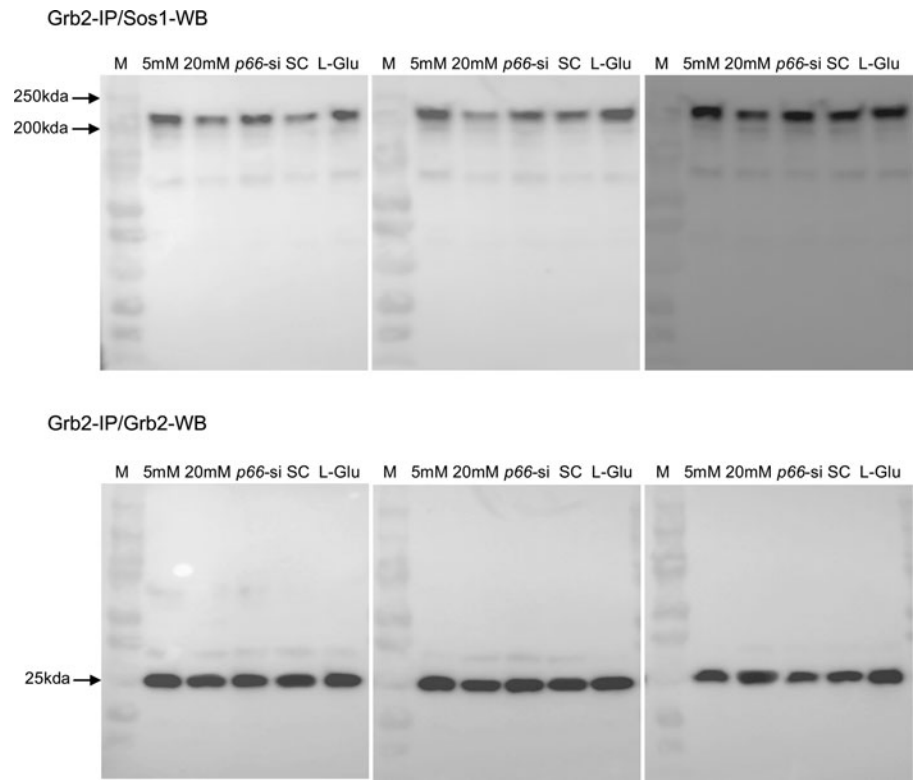

**SUPPLEMENTARY FIG. S3. Grb2-IP/Sos1-WB and Grb2-IP/Grb2-WB.** Grb2, growth factor receptor-bound protein 2.

Supplement: Supp_Fig3.pdf [file Supp_Fig3.pdf]

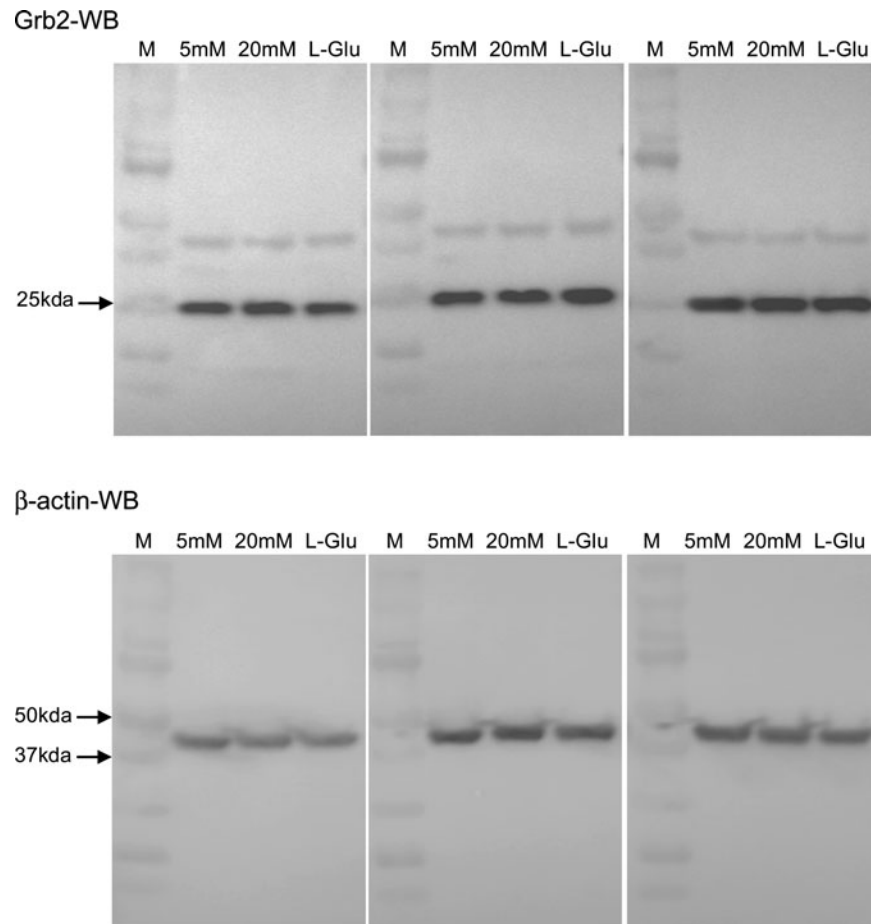

**SUPPLEMENTARY FIG. S4. Grb2-WB and β-actin-WB.**

Supplement: Supp_Fig4.pdf [file Supp_Fig4.pdf]

p-p66Shc-WB

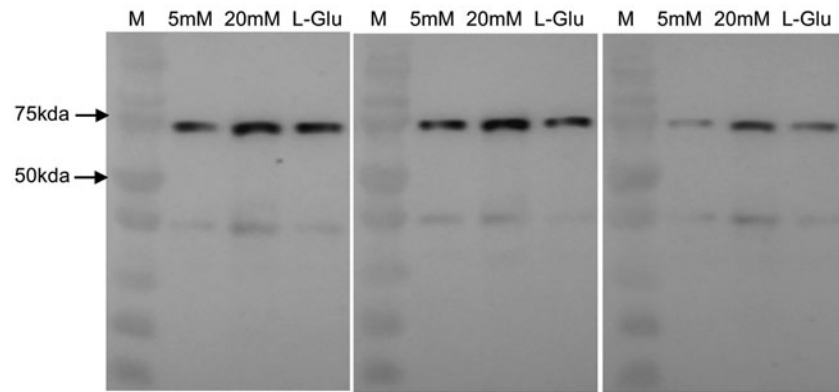

p66Shc-WB

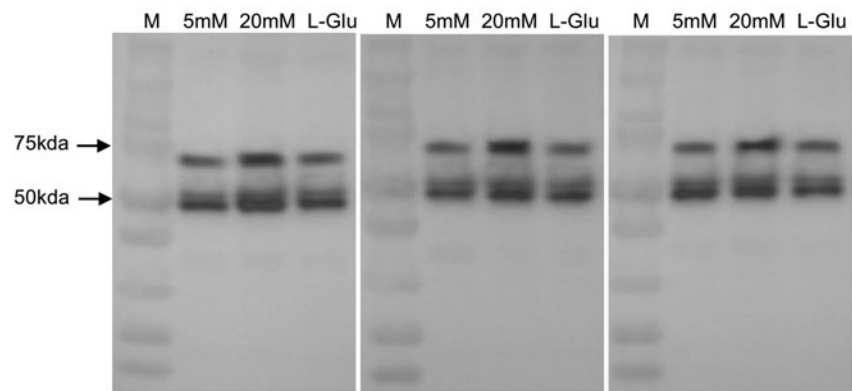

**SUPPLEMENTARY FIG. S5. p-p66Shc-WB and p66Shc-WB.**

Supplement: Supp_Fig5.pdf [file Supp_Fig5.pdf]
